# Supplementary material for: Clinical Effectiveness and Side Effect Profile of Contraceptive Implant (Implanon) Among Women at Sulaimaniyah City, Iraq
Source: Research Square preprint supplement (doi:10.21203/rs.3.rs-6740734/v1), 2025-06-26
Supplement: Supplementary file 1 [file 8014c6e4f6bcb5c6fbafa364.docx]

**QUESTIONNAIRE**

**Patient Name: ID: Address:**

**Telephone number: Code:**

**PART 1.** The sociodemographic characteristics of the patients.

| **Sociodemographics** | |  |
| --- | --- | --- |
| **Age (Years)** | 20 |  |
| 20 – 24 |  |
| 25 – 29 |  |
| 30 – 35 |  |
| 35 |  |
| **Body mass index (kg/m2)** | Underweight (<18.5) |  |
| Normal (18.5 – 24.9) |  |
| Overweight (25 – 29.9) |  |
| Obese (30) |  |
| **Residency** | Urban |  |
| Rural |  |
| **Education status** | Primary school |  |
| Intermediate school |  |
| High school |  |
| University |  |
| **Occupation** | Employed |  |
| Student |  |
| Unemployed |  |

**PART 2.** The medical information of the patients.

| **Variables** | |  |
| --- | --- | --- |
| **Parity** | 0 |  |
| 1 – 2 |  |
| ≥3 |  |
| **Duration of menstrual bleeding (Days)** | 3 – 4 |  |
| 5 – 6 |  |
| 7 |  |
| **Duration of implanon implant (Years)** | <1 |  |
| <2 |  |
| Completed 3-year |  |
| **Implanon removal** | Yes |  |
| No |  |
| **Reasons for implanon removal or would like to remove it**  **(n=55)** | Expired (completed 3 years) |  |
| Weight gain |  |
| Want to conceive (planned to get pregnant) |  |
| Menstrual irregularity |  |
| Headache |  |
| Migration |  |
| **Facing difficulty in implant process** | No difficulty |  |
| Difficulty during insertion |  |
| Difficulty during removal |  |
| Difficulty during insertion & removal |  |
| **Preinsertion counseling** | Yes |  |
| No |  |
| **Medical history** | No prior medical history |  |
| Migraine |  |
| Hypothyroidism |  |
| Diabetes mellitus |  |
| Others |  |

**PART 3.** Side-effects of implanon after 6 months of insertion and likelihood to removal.

| **Side effects experienced** | | **Implanon removal** | | | |
| --- | --- | --- | --- | --- | --- |
| **No** | | **Yes** | |
| **No.** | **%** | **No.** | **%** |
| **Weight gain** | No |  |  |  |  |
| Yes |  |  |  |  |
| **Headache** | No |  |  |  |  |
| Yes |  |  |  |  |
| **Pain/numbness in the arm** | No |  |  |  |  |
| Yes |  |  |  |  |
| **Loss of libido** | No |  |  |  |  |
| Yes |  |  |  |  |
| **Dizziness** | No |  |  |  |  |
| Yes |  |  |  |  |
| **Abnormal bleeding** | No |  |  |  |  |
| Yes |  |  |  |  |

**PART 4.** Patterns of bleeding of study samples.

| **Bleeding Pattern** |  |
| --- | --- |
| **Normal** |  |
| **Infrequent (oligomenorrhea)** |  |
| **Frequent (heavy cycle, intermenstrual bleeding, and spotting)** |  |
| **Amenorrhea** |  |

**PART 5.** Contraceptive efficacy of implanon among women.

| **Variable** | **Category** | **Frequency** |
| --- | --- | --- |
| **Contraceptive efficacy while using implanon** | Became pregnant |  |
| Not pregnant |  |
| **Return of fertility after 6 months of implanon removal** | Became pregnant |  |
| Not pregnant |  |
